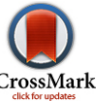

## Correction

# Correction: R-Loops in Proliferating Cells but Not in the Brain: Implications for AOA2 and Other Autosomal Recessive Ataxias

## The PLOS ONE Staff

The sixth author's name is spelled incorrectly. The correct name is: Piroon Jenjaroenpun.

## Reference

1. Yeo AJ, Becherel OJ, Luff JE, Cullen JK, Wongsurawat T, et al. (2014) R-Loops in Proliferating Cells but Not in the Brain: Implications for AOA2 and Other Autosomal Recessive Ataxias. PLoS ONE 9(3): e90219. doi:10.1371/journal.pone.0090219

---

**Citation:** The PLOS ONE Staff (2014) Correction: R-Loops in Proliferating Cells but Not in the Brain: Implications for AOA2 and Other Autosomal Recessive Ataxias. PLoS ONE 9(8): e105258. doi:10.1371/journal.pone.0105258

**Published:** August 6, 2014

**Copyright:** © 2014 The PLOS ONE Staff. This is an open-access article distributed under the terms of the Creative Commons Attribution License, which permits unrestricted use, distribution, and reproduction in any medium, provided the original author and source are credited.
